# Supplementary material for: Kinetics of multicompartment micelle formation by self-assembly of ABC miktoarm star terpolymer in dilute solution
Source: Royal Society of Chemistry journal article supplement (doi:10.1039/c2sm26886h), 2012-01-01
Supplement: c2sm26886h.pdf [file c2sm26886h.pdf]

## Supporting information for [Kinetics of Multicompartment Micelles Formation by Self-assembly of ABC Miktoarm Star Terpolymer in Dilute Solution]

*Long Wang<sup>1</sup>, Rui Xu<sup>1</sup>, Zilu Wang<sup>1</sup>, Xuehao He<sup>2,\*</sup>*

<sup>1</sup>Department of Polymer Science and Engineering, School of Chemical Engineering and Technology, Tianjin University, 300072 Tianjin, China

<sup>2</sup>Department of Chemistry, School of Science, Tianjin University, 300072 Tianjin, China

The free energy of prolate vesicle (with the area  $S$ ) with ringlike AC strip structure equals:

$$F = (E_{\text{curvature}} + E_{\text{sst}}) / S \quad (1)$$

where  $E_{\text{curvature}}$  and  $E_{\text{sst}}$  are the vesicle curvature energy and the free energy of phase separation in A and C two components in vesicle wall, respectively. Here, we neglect the thickness of vesicle wall. The curvature free energy is expressed as follows:

$$E_{\text{curvature}} = \iint \frac{1}{2} k_c (C_1 + C_2 - C_0)^2 dS \quad (2)$$

where  $k_c$  is elastic moduli,  $C_1$  and  $C_2$  are the two principal curvatures of the specified surface, and  $C_0$  is the spontaneous curvature which equals zero.

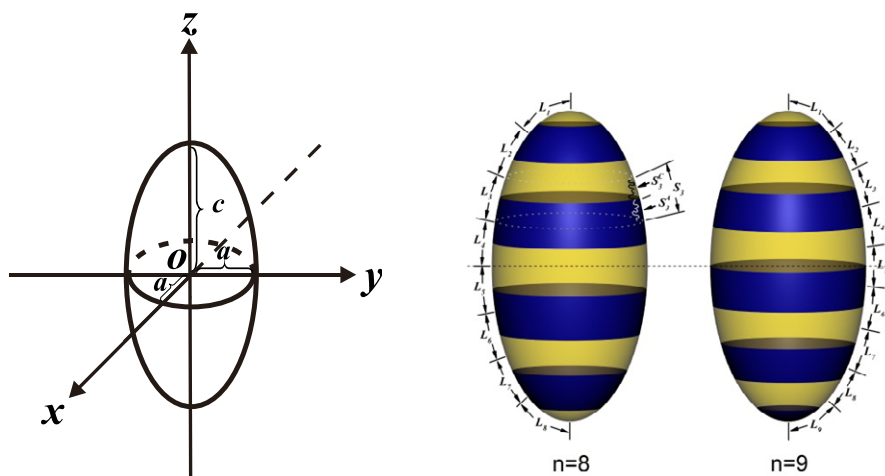

Figure S1

Figure S1 is the scheme of prolate ellipsoid. The minor and major axis are  $a$  and  $c$ , respectively.

The vesicle area  $S$  equals  $S = 2\pi a^2 (1 + c \sin^{-1} e / (ae))$  where  $e = \sqrt{1 - a^2 / c^2}$ . The coordinates  $Y=(x, y, z)$  of oblate ellipsoid vesicle is expressed with polar coordinates:

$$Y = (a \sin \theta \cos \phi, a \sin \theta \sin \phi, c \cos \theta) \quad (0 \leq \theta \leq \pi, 0 \leq \phi \leq 2\pi) \quad (3)$$

The two principal curvatures  $C_1$  and  $C_2$  equal:

$$C_1 = \frac{ac}{(a^2 \cos^2 \theta + c^2 \sin^2 \theta)^{3/2}}, \quad C_2 = \frac{c}{a(a^2 \cos^2 \theta + c^2 \sin^2 \theta)^{1/2}} \quad (4)$$

The unit area  $dS$  equals:

$$dS = 2\pi(a \sin \theta)(\sqrt{a^2 \cos^2 \theta + c^2 \sin^2 \theta})d\theta \quad (5)$$

According to Eq.2, Eq.4, Eq.5 and defining the ratio of minor axis to major axis as  $m = a/c$ , the final expression of curvature energy is

$$E_{curvature} = \int_0^\pi k_c \pi m^{-1} (m^4 Q^{-3} + 2m^2 Q^{-2} + Q^{-1}) \sin \theta \sqrt{Q} d\theta \quad (6)$$

where  $Q = m^2 \cos^2 \theta + \sin^2 \theta$ .

In Eq.1, the interface energy of A and C strip phase equals  $E_{interface} = \sum_{i=1}^n 2\pi R_i \gamma$ , where  $n$  is the interface number,  $\gamma$  is the tension of phase interface,  $R_i$  is the radius of the  $i$ th AC interface ring. Obviously,  $R_i$  equal  $a \sin \theta_i$  according to Eq.3. The stretching length of chain in longitude direction in present model is assumed to be equal i.e.,  $L_i = L_j$  ( $i, j \in n$ ). Meanwhile, the incompressible condition makes the A and C areas ( $S_i^A$  and  $S_i^C$ ) at every copolymer layer equal  $S_i^A = S_i^C$  ( $i = 1 \sim n$ ). So, the elasticity energy of block polymer chain equals:

$$\begin{aligned} E_{AC-elasticity} &= \sum_{i=1}^n \iint_{S_i} \frac{1}{2} k_e l_i^2 dS_i \\ &= \sum_{i=1}^n \int_{L_i} \frac{1}{2} k_e l_i^2 (2\pi R_i^l) dL_i \end{aligned} \quad (9)$$

where  $k_e$  is the elastic module of polymer chain and  $l_i$  is the longitude arclength from area unit of  $S_i$  to the  $i$ th interface.  $R_i^l$  is the section radius of area unit of  $S_i$  parallel to the  $i$ th AC interface.

In numerical calculation,  $a$  and  $c$  are firstly solved with the area equation of prolate ellipsoid after the area  $S$ , axis length ratio  $m$  and interface number  $n$  are fixed. Further,  $\theta_i$  is numerically

calculated to satisfies  $L_i = L_j$  ( $i, j \in n$ ) and  $S_i^A = S_i^C$  ( $i = 1 \sim n$ ). Then, total free energy  $F$  is numerically integrated from Eq.1, Eq.5 and Eq.9. Finally, the free energy at differently interface number  $n$  are compared to determine the stable structure with the lowest energy at fixed  $S$  and  $m$ . Figure S2 show the dependences of the curvature energy  $E_{\text{curvature}}$  and phase separation energy  $E_{\text{sst}}$  on  $m$ , respectively, at  $k_c = 5.0 \times 10^{-3}$ ,  $k_e = 1.0$ ,  $\gamma = 0.03$  and  $S=5$ .

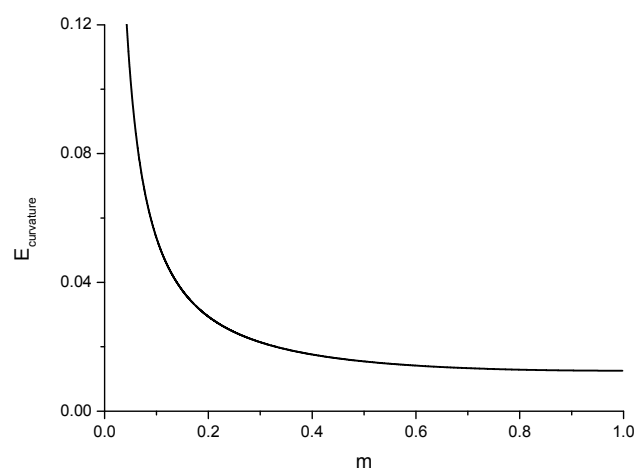

**a**

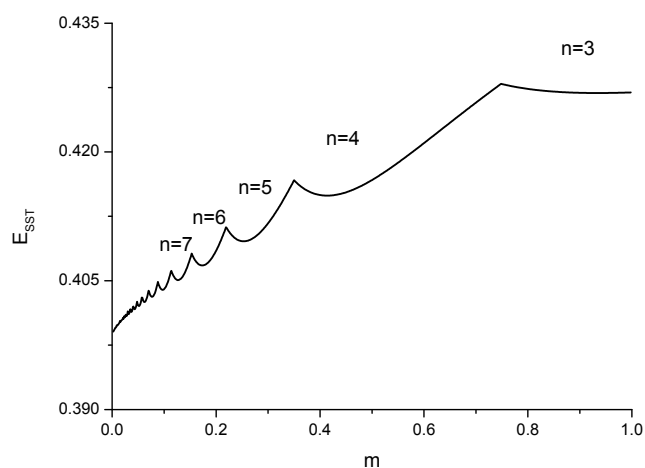

**b**

Figure S2. The dependences of the curvature energy  $E_{\text{curvature}}$  and the energy  $E_{\text{sst}}$  of phase separation on  $m$ , respectively.  $k_c = 5.0 \times 10^{-3}$ ,  $k_e = 1.0$ ,  $\gamma = 0.03$ . The vesicle area  $S$  equals 5.
